# Supplementary material for: Rapid ionic conductivity of ternary composite electrolytes for superior solid-state batteries with high-rate performance and long cycle life operated at room temperature
Source: Royal Society of Chemistry journal article supplement (doi:10.1039/d1ta05751k), 2021-01-01
Supplement: d1ta05751k1.pdf [file d1ta05751k1.pdf]

## Electronic Supplementary Information (ESI)

### **Rapid ionic conductivity of ternary composite electrolytes for superior solid-state batteries with high rate and long cycle life operated at room temperature**

Wei Xiong,<sup>ab+</sup> Tao Huang,<sup>a+</sup> Yuqing Feng,<sup>a+</sup> Xue Ye,<sup>a</sup> Xiaoyan Li,<sup>a</sup> Jianneng Liang,<sup>a</sup>  
Shenghua Ye,<sup>ac</sup> Xiangzhong Ren,<sup>a</sup> Yongliang Li,<sup>a</sup> Qianling Zhang,<sup>\*a</sup> Jianhong Liu<sup>\*ac</sup>

<sup>a</sup> Graphene Composite Research Center, College of Chemistry and Environmental Engineering, Shenzhen University, 518060, P.R. China

<sup>b</sup> College of Physics and Optoelectronic Engineering, Shenzhen University, Shenzhen, 518060, P.R. China

<sup>c</sup> Shenzhen Eigen-Equation Graphene technology Co. Ltd, Shenzhen, 518060, P.R. China

\*Corresponding authors

+Contribute equally to this work

Email address: liujh@szu.edu.cn (J. Liu), zhql@szu.edu.cn (Q. Zhang)

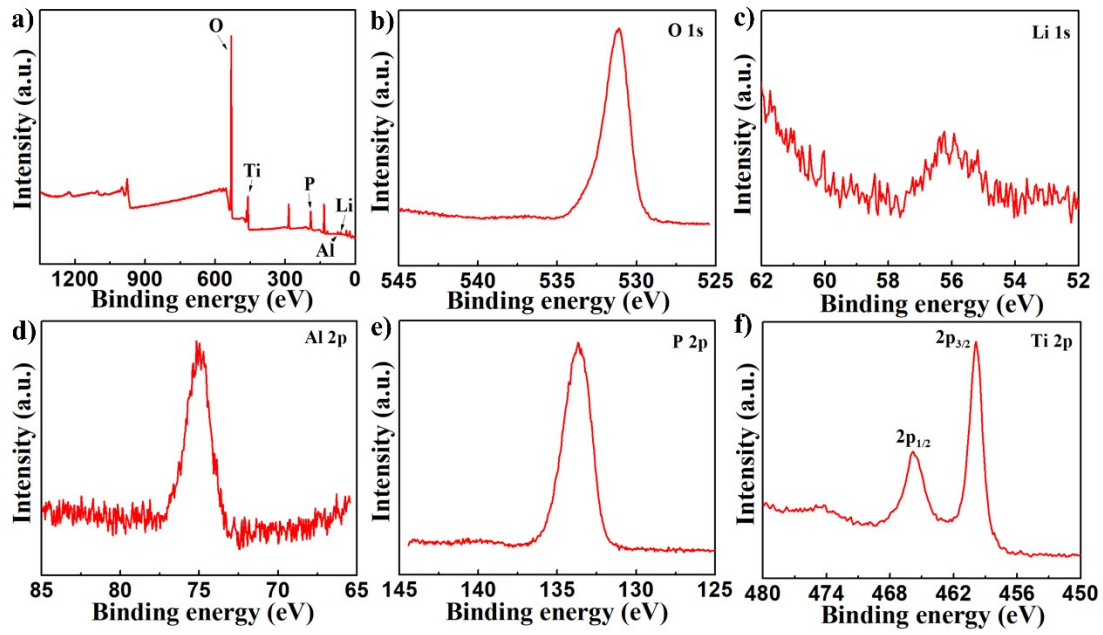

**Figure S1.** XPS spectra of LATP.

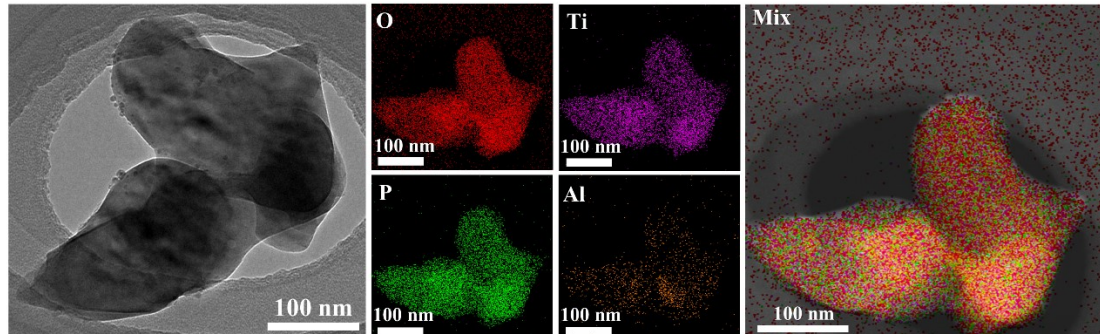

**Figure S2.** TEM and elemental mapping images of LATP particles.

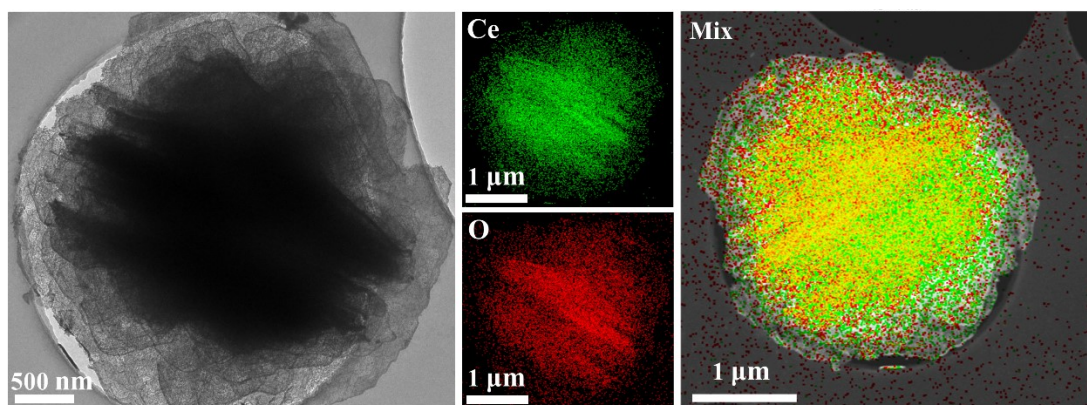

**Figure S3.** TEM and elemental mapping images of flower-like CeO<sub>2</sub>.

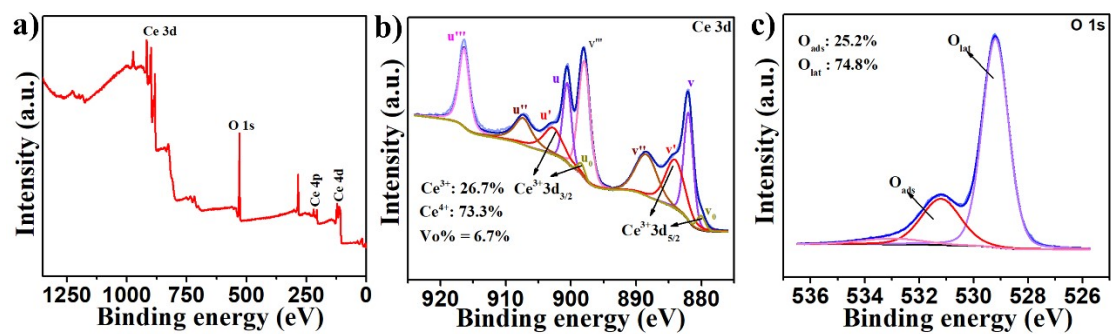

**Figure S4.** XPS spectra of the flower-like CeO<sub>2</sub> particles with oxygen vacancies (a) survey spectrum, (b) Ce 3d, and (c) O 1s.

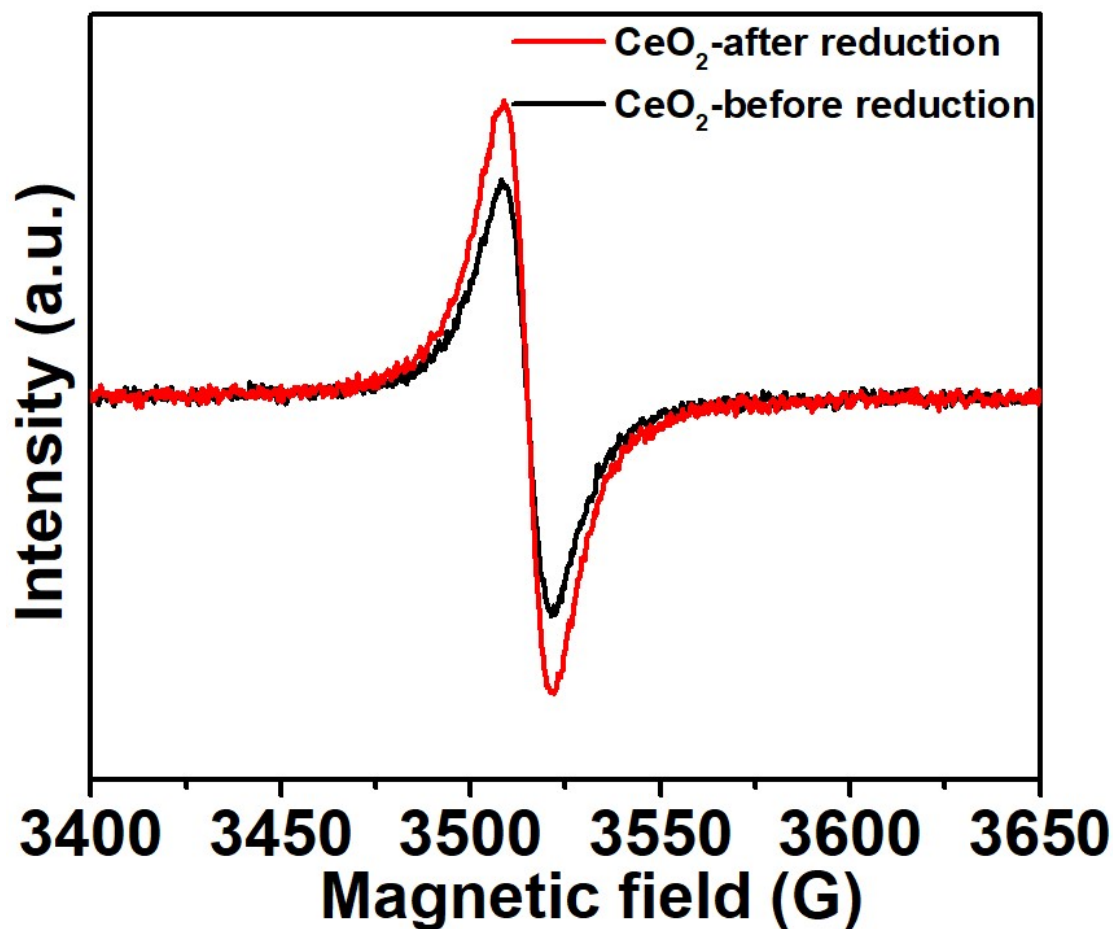

Figure S5. EPR spectra of flower-like  $\text{CeO}_2$  particles before and after hydrogen reduction.

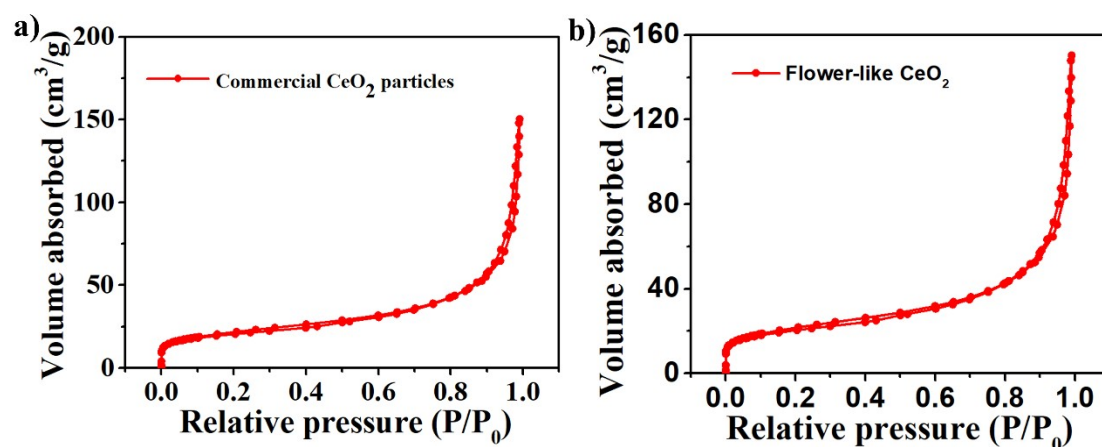

Figure S6. Nitrogen adsorption-desorption isotherms of (a) commercial  $\text{CeO}_2$  particles, (b) flower-like  $\text{CeO}_2$ .

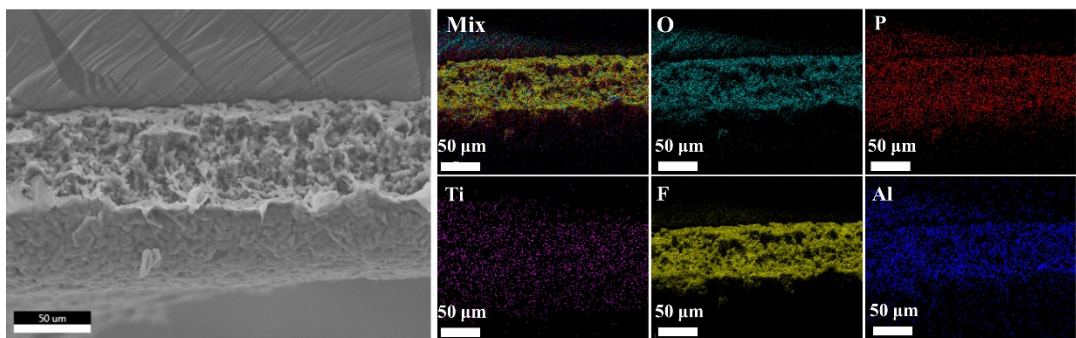

**Figure S7.** Elemental mapping of the cross-sectional PVDF-HFP/LiTFSI/LATP film.

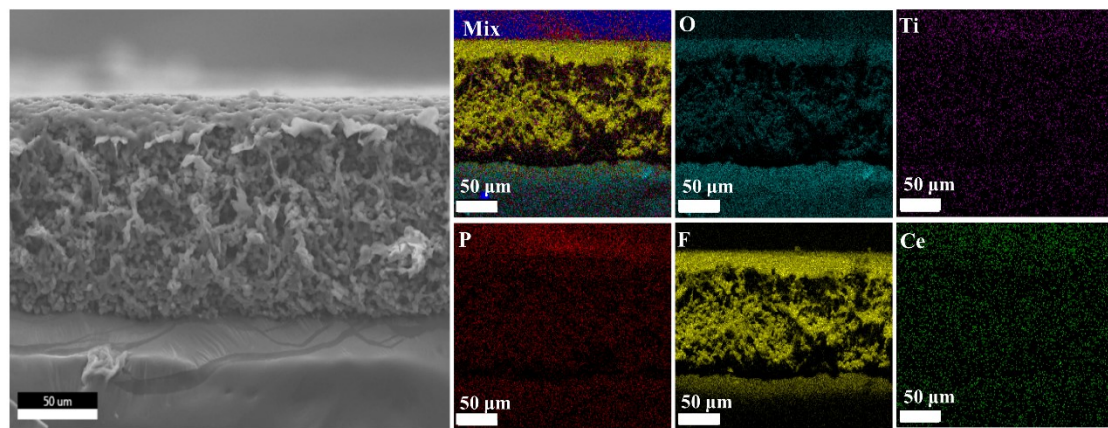

**Figure S8.** Elemental mapping of the cross-sectional PVDF-HFP/LiTFSI/LATP/CeO<sub>2</sub> film.



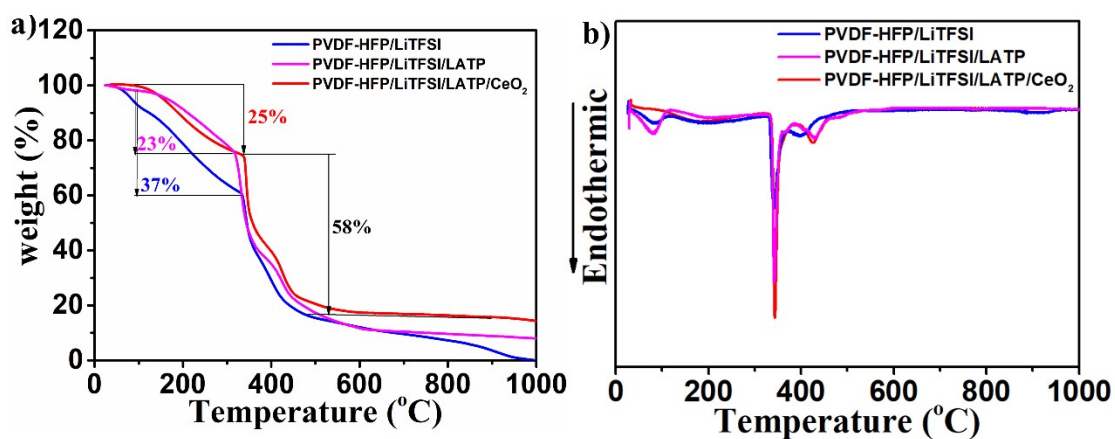

**Figure S9.** (a) TGA and (b) Differential Thermal Analysis (DTA) curves of PVDF-HFP/LiTFSI, PVDF-HFP/LiTFSI/LATP and PVDF-HFP/LiTFSI/LATP/CeO<sub>2</sub> CSEs.

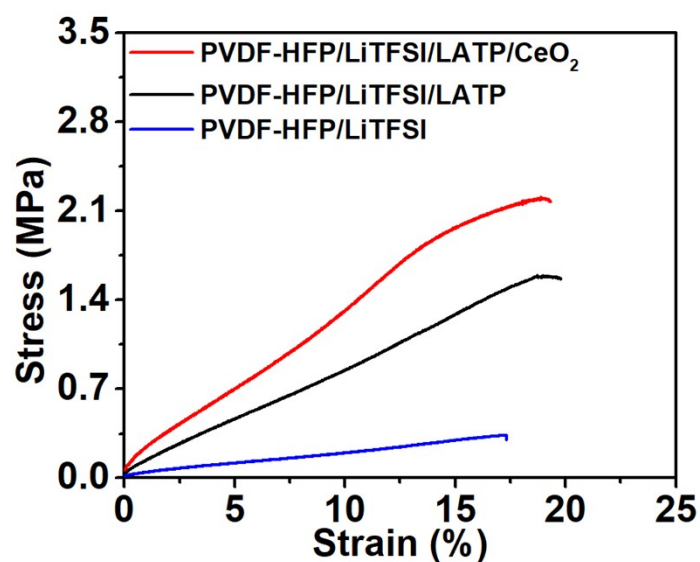

**Figure S10.** Stress-strain curves of PVDF-HFP/LiTFSI, PVDF-HFP/LiTFSI/LATP, PVDF-HFP/LiTFSI/LATP/CeO<sub>2</sub> films.

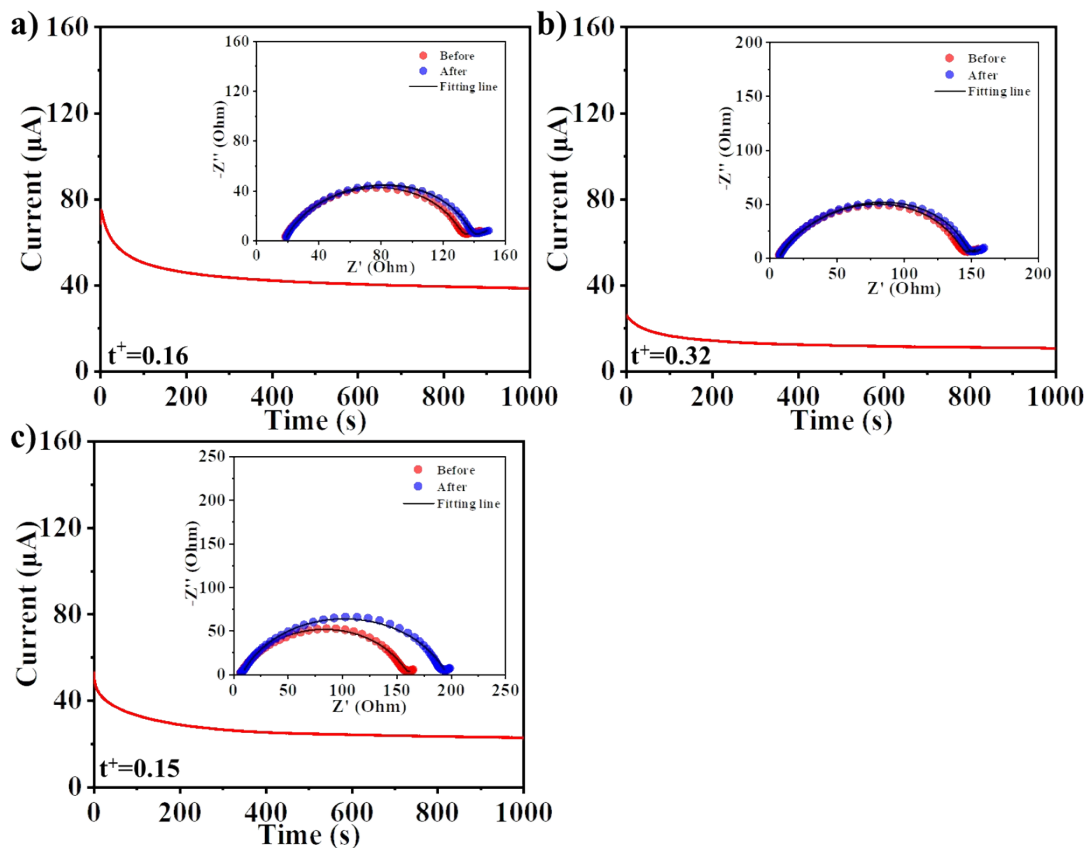

**Figure S11.** Chronoamperometry curves of (a) PVDF-HFP/LiTFSI/LATP, (b) PVDF-HFP/LiTFSI/CeO<sub>2</sub> and (c) PVDF-HFP/LiTFSI under a potential step of 10 mV at room temperature.

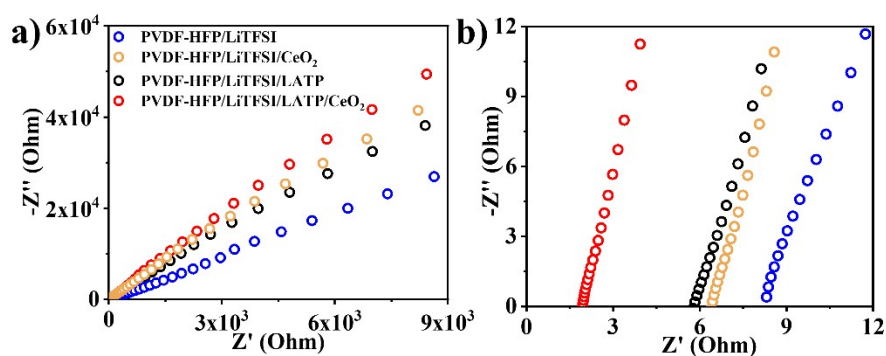

**Figure S12.** (a) Nyquist plots of SS/CSE/SS cells with the PVDF-HFP/LiTFSI, PVDF-HFP/LiTFSI/CeO<sub>2</sub>, PVDF-HFP/LiTFSI/LATP and PVDF-HFP/LiTFSI /LATP/CeO<sub>2</sub> as electrolytes, before electrochemical cycling test. (b) The image of the magnified

region with high frequency.

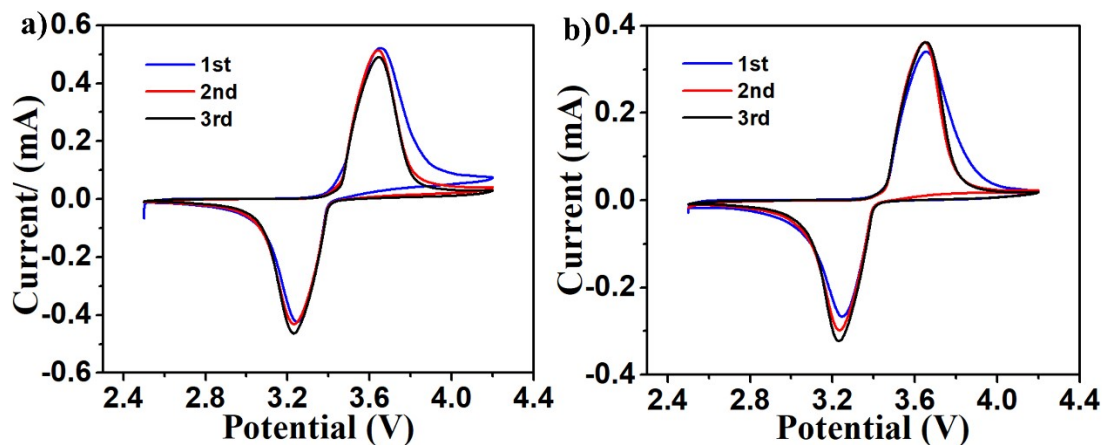

**Figure S13.** CV curves of LFP cells with (a) PVDF-HFP/LiTFSI/LATP, and (b) PVDF-HFP/LiTFSI/LATP/CeO<sub>2</sub> as the electrolyte.

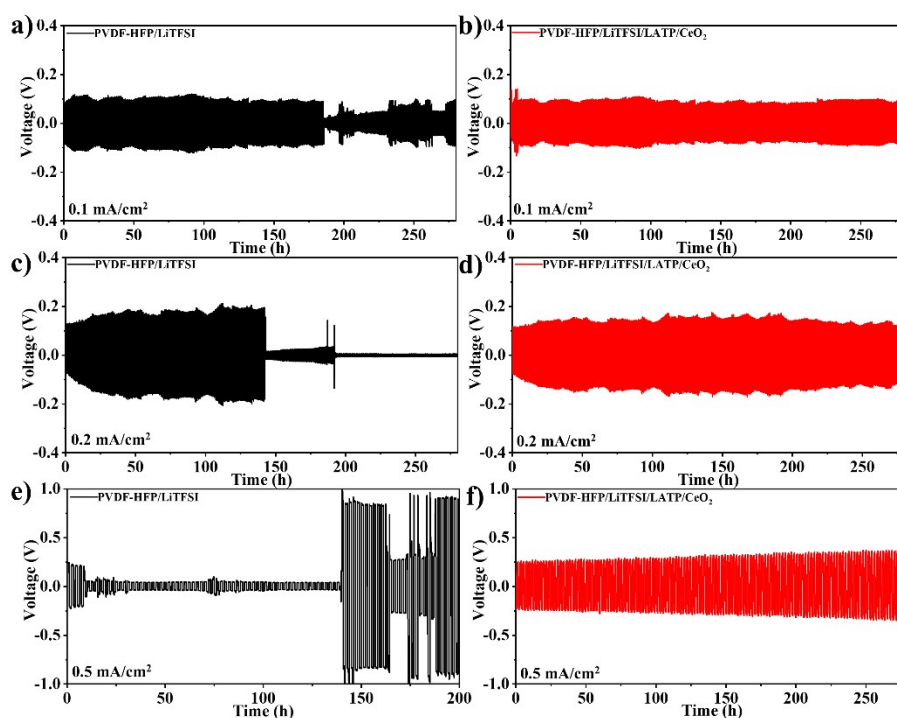

**Figure S14.** Voltage-time profile of Li/(PVDF-HFP/LiTFSI)/Li and Li/(PVDF-HFP/LiTFSI/LATP/CeO<sub>2</sub>)/Li at 0.1, 0.2 and 0.5 mA cm<sup>-2</sup>.



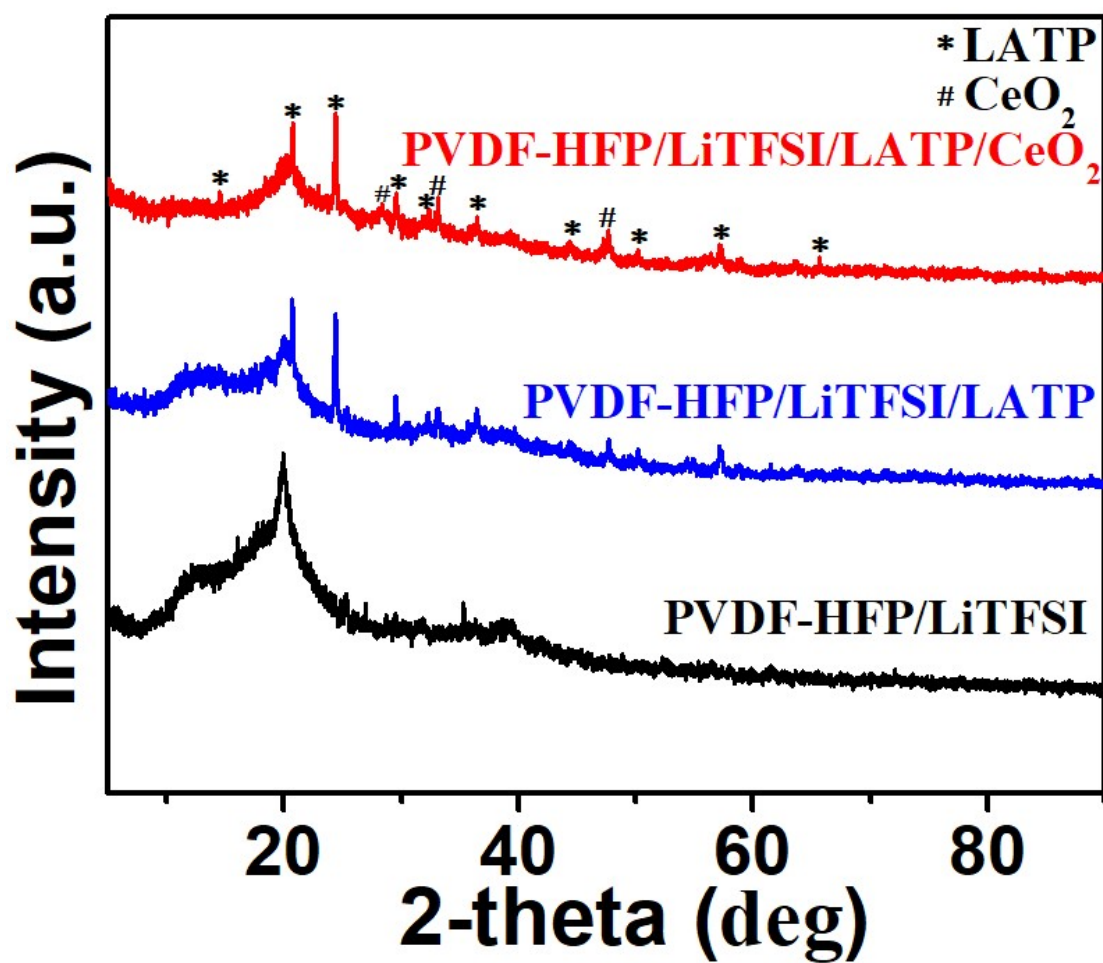

**Figure S15.** XRD patterns of the PVDF-HFP/LiTFSI, PVDF-HFP/LiTFSI/LATP, PVDF-HFP/LiTFSI/LATP/CeO<sub>2</sub> electrolytes in the LFP cells after electrochemical cycles at 2 C.

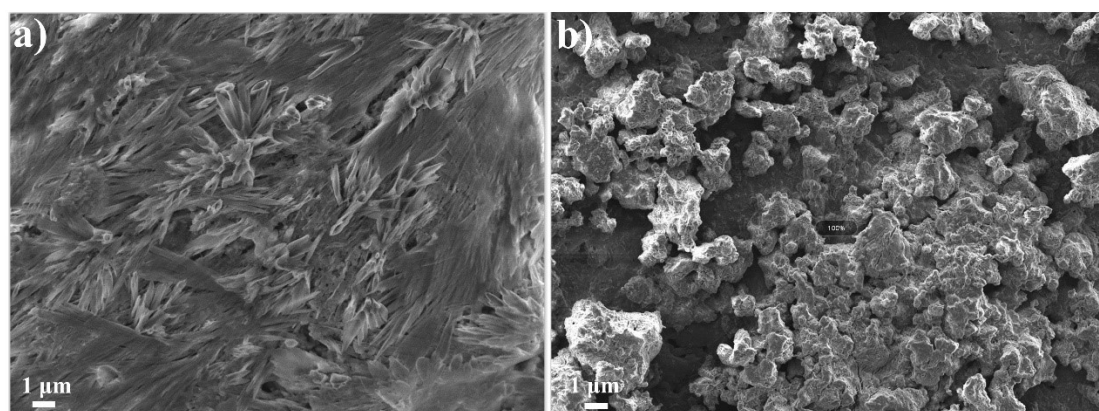

**Figure S16.** SEM images of the surface morphologies of (a) PVDF-HFP/LiTFSI/LATP and (b) PVDF-HFP/LiTFSI/LATP/CeO<sub>2</sub> CSEs after plating/stripping

cycles.

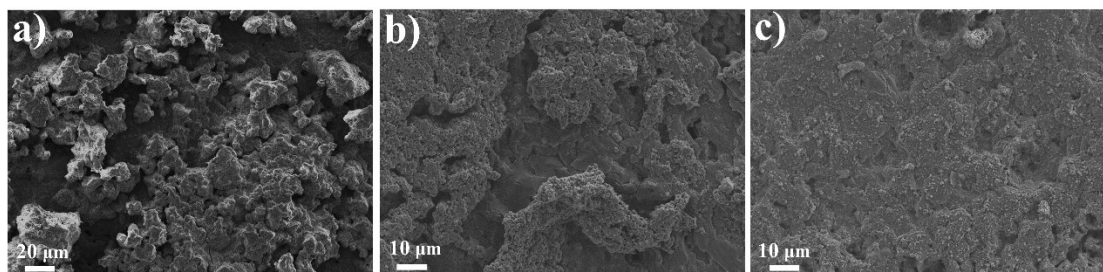

**Figure S17.** SEM images of surface morphologies of (a) PVDF-HFP/LiTFSI, (b) PVDF-HFP/LATP/LiTFSI, and (c) PVDF-HFP/LiTFSI/LATP/CeO<sub>2</sub> films contacted with Li metal after 1000 cycles at 2 C.

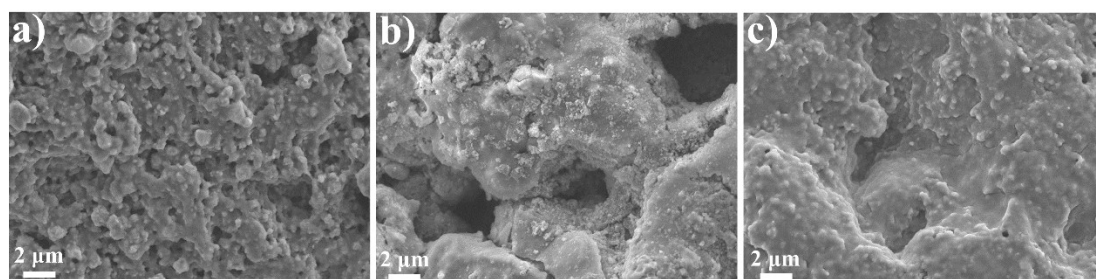

**Figure S18.** SEM images of the surface morphologies of (a) PVDF-HFP/LiTFSI, (b) PVDF-HFP/LATP/LiTFSI, and (c) PVDF-HFP/LiTFSI/LATP/CeO<sub>2</sub> films contacted with LFP cathode after 1000 cycles at 2 C.

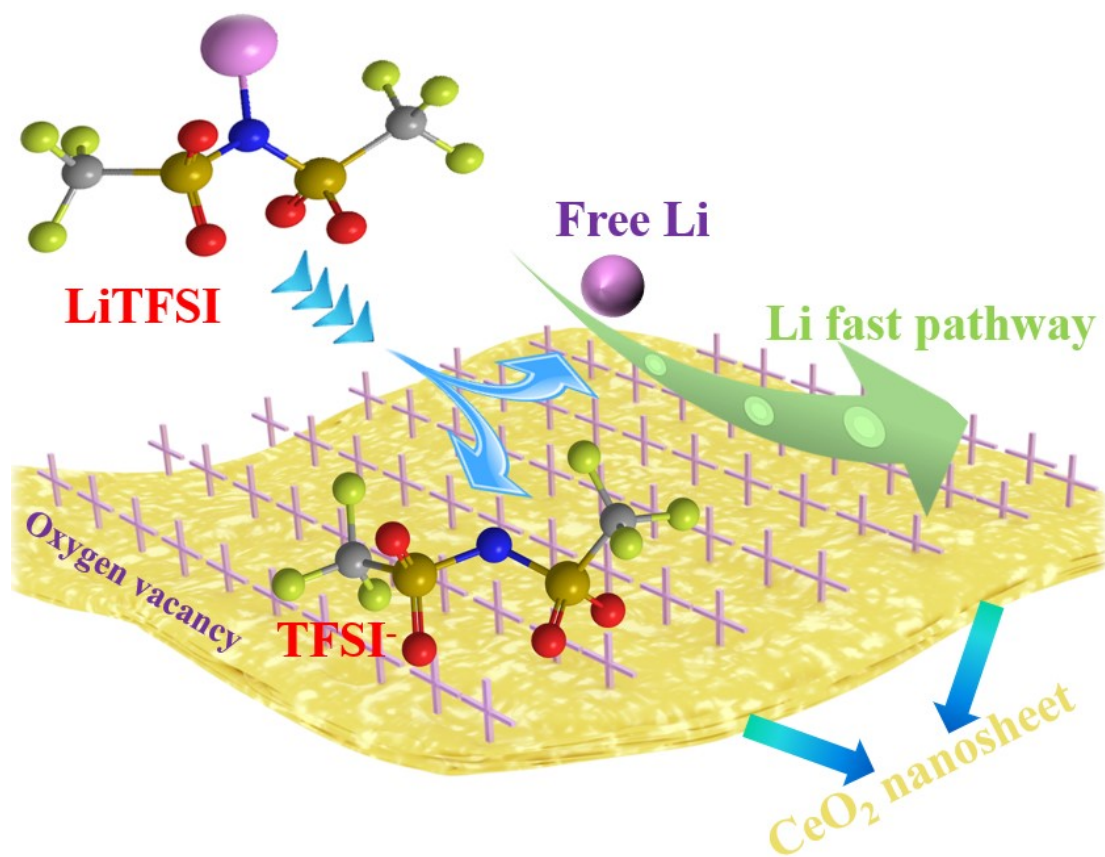

**Figure S19.** Schematic illustration of the dissociation process of LiTFSI induced by CeO<sub>2</sub> with oxygen vacancies.

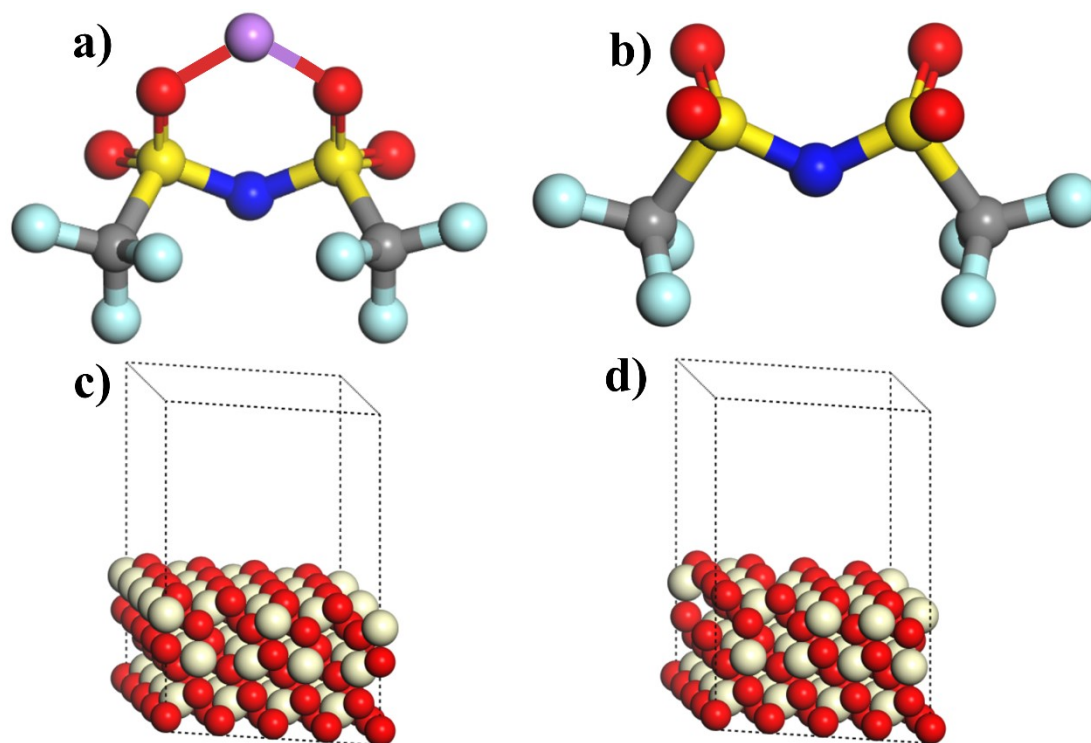

**Figure S20.** The molecular structures with the lowest energy conformation of a) LiTFSI and b) TFSI<sup>-</sup> anion.

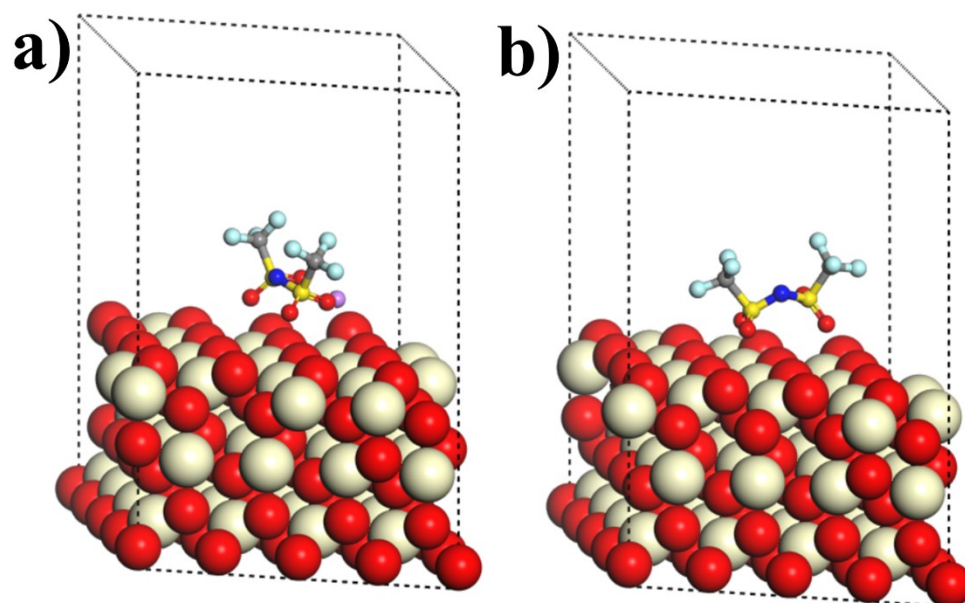

**Figure S21.** The most stable crystallographic structures of (a,c) LiTFSI, and (b,d) TFSI<sup>-</sup> anion adsorbed on the CeO<sub>2</sub> (111) surface atomic structure. O in red, Ce in light yellow, C in gray, F in light blue, S in yellow, N in blue, Li in purple.

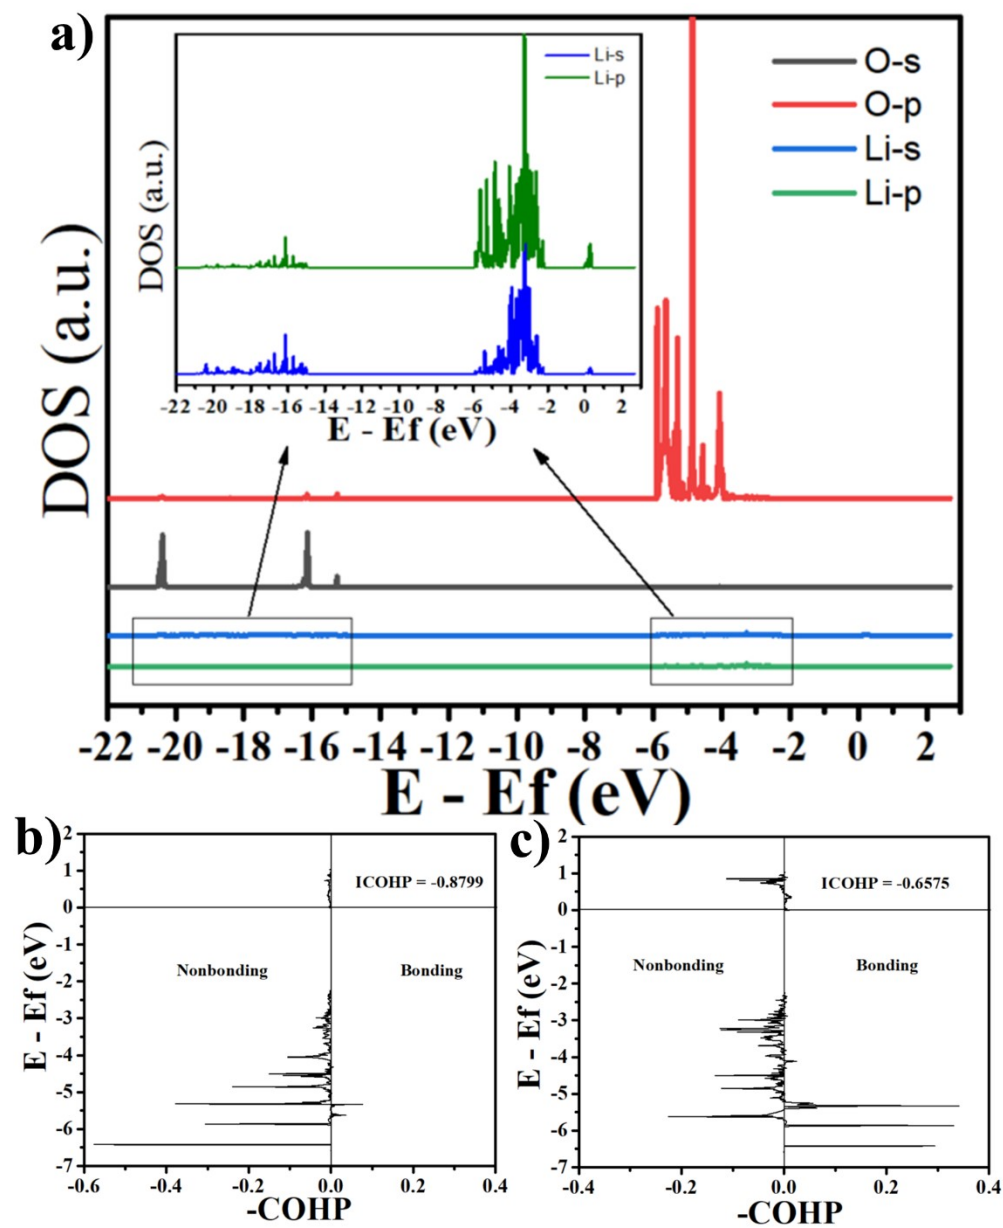

**Figure S22.** (a) PDOS, and (b,c) COHP images of the interaction between LiTFSI and  $\text{CeO}_2$  (111) surface with one oxygen vacancy.



**Table S1.** Peak positions and areas for core level of Ce 3d in CeO<sub>2</sub> nanosheets

|                                                                         | peaks  | u'''    | u''     | u              | v'''           | v''     | v       |
|-------------------------------------------------------------------------|--------|---------|---------|----------------|----------------|---------|---------|
| <b>Ce<sup>4+3</sup></b><br><b>d</b>                                     | BE(eV) | 916.38  | 907.33  | 900.59         | 897.96         | 888.43  | 881.99  |
|                                                                         | area   | 70181.7 | 8920    | 54064          | 04748.9        | 67884.8 | 76596.8 |
|                                                                         |        | 7       |         |                |                | 8       | 4       |
|                                                                         | peaks  | u'      | v'      | u <sub>0</sub> | v <sub>0</sub> |         |         |
| <b>Ce<sup>3+3</sup></b><br><b>d</b>                                     | BE(eV) | 902.74  | 884.06  | 898.42         | 880.08         |         |         |
|                                                                         | area   | 49558.5 | 74337.8 | 6132.38        | 9198.57        |         |         |
|                                                                         |        | 5       | 3       | 6              | 9              |         |         |
| <b>[Ce<sup>3+</sup>] = 26.7%, [Ce<sup>4+</sup>] = 73.3%, [Vo]= 6.7%</b> |        |         |         |                |                |         |         |

**Table S2.** Peak positions and areas for core level of O 1s in CeO<sub>2</sub> nanosheets.

|                                                         | peaks  | O <sub>ads</sub> | O <sub>lat</sub> |
|---------------------------------------------------------|--------|------------------|------------------|
| <b>O 1S</b>                                             | BE(eV) | 531.2            | 529.2            |
|                                                         | area   | 27947.98         | 83029.78         |
|                                                         |        |                  |                  |
| <b>[O<sub>ads</sub>]=25.2%, [O<sub>lat</sub>]=74.8%</b> |        |                  |                  |

**Table S3.** Comparison of electrochemical performance between our work and reported state-of-the-art CSEs.

| CSEs composition                         | Ionic conductivity /Temperature                       | Electrochemical window (V) | Li <sup>+</sup> transfer number | Specific capacity of LFP cells/Temperature                                                       | Reference                          |
|------------------------------------------|-------------------------------------------------------|----------------------------|---------------------------------|--------------------------------------------------------------------------------------------------|------------------------------------|
| <b>PVDF-HFP/LATP/CeO<sub>2</sub></b>     | <b>1.66 × 10<sup>-3</sup> S cm<sup>-1</sup> 25 °C</b> | <b>5.1</b>                 | <b>0.35</b>                     | <b>166.6 mAh g<sup>-1</sup> at 0.1 C, 83.1 mAh g<sup>-1</sup> at 2 C after 1000 cycles 25 °C</b> | <b>This work</b>                   |
| Ca-CeO <sub>2</sub> /PEO                 | 1.3 × 10 <sup>-4</sup> S cm <sup>-1</sup> 60 °C       | 4.5                        | 0.453                           | 93 mAh g <sup>-1</sup> after 200 cycles at 1 C 60 °C                                             | Adv. Energy Mater. <sup>1</sup>    |
| CeO <sub>2</sub> /PEO                    | 1.1 × 10 <sup>-3</sup> S cm <sup>-1</sup> 60 °C       | 5.1                        | 0.47                            | 160 mAh g <sup>-1</sup> at 0.1 C 60 °C                                                           | Nano Energy <sup>2</sup>           |
| CeO <sub>2</sub> /PEO/liquid electrolyte | 9.09 × 10 <sup>-5</sup> S cm <sup>-1</sup> 30 °C      | 4.89                       | 0.4                             | 155.3mAh g <sup>-1</sup> after 130 cycles at 1 C and 30 °C                                       | J. Membr. Sci. <sup>3</sup>        |
| PEG-MDI/LiDMPA                           | 1 × 10 <sup>-4</sup> S cm <sup>-1</sup> 25 °C         | 5                          | 0.72                            | 159 mAh/g 50th 99.1% at 0.2 C 80 °C                                                              | J. Mater. Chem. A <sup>4</sup>     |
| LLTO/PEO/FEC                             | 1.13 × 10 <sup>-4</sup> S cm <sup>-1</sup> 25 °C      | 5.2                        | 0.35                            | 86 mAh·g <sup>-1</sup> at 0.5 C 35 °C                                                            | Chem. Eng. J. <sup>5</sup>         |
| PEO/CsClO <sub>4</sub>                   | 1.9 × 10 <sup>-4</sup> S cm <sup>-1</sup> 60 °C       | 4.35                       | NA                              | 120 mAh·g <sup>-1</sup> at 0.5 C 60 °C                                                           | Energy Storage Mater. <sup>6</sup> |
| LLZTO/PEO                                | 2.3 × 10 <sup>-5</sup> S cm <sup>-1</sup> 30 °C       | 5.03                       | 0.47                            | 100 mAh·g <sup>-1</sup> at 0.1 C 30 °C                                                           | Adv. Energy Mater. <sup>7</sup>    |
| SiO <sub>2</sub> areogel/PEO             | 6 × 10 <sup>-4</sup> S cm <sup>-1</sup> 60 °C         | 5                          | NA                              | 110 mAh·g <sup>-1</sup> at 0.5 C 25 °C                                                           | Adv. Mater. <sup>8</sup>           |
| PEO/ionic liquid                         | 5.01 × 10 <sup>-4</sup> S cm <sup>-1</sup> 60 °C      | 5.26                       | 0.34                            | 160.3 mAh g <sup>-1</sup> at 0.2 C 60 °C                                                         | Energy Storage Mater. <sup>9</sup> |
| PVDF/PEO                                 | NA                                                    | 4                          | NA                              | 97.8 mAh g <sup>-1</sup> at 1 C                                                                  | Chem. Eng.                         |

|                                                       |                         |      |       |                                                    |                                  |                  |
|-------------------------------------------------------|-------------------------|------|-------|----------------------------------------------------|----------------------------------|------------------|
|                                                       |                         |      |       |                                                    | after 600 cycles                 | J. <sup>10</sup> |
|                                                       |                         |      |       |                                                    | 70 °C                            |                  |
| PEO/BN                                                | $1.45 \times 10^{-4}$ S | 5.16 | 0.33  | 143.3 mAh·g <sup>-1</sup> at 0.1 C                 | J. Mater. Chem. A <sup>11</sup>  |                  |
|                                                       | cm <sup>-1</sup>        |      |       |                                                    |                                  |                  |
|                                                       |                         |      |       |                                                    | 60 °C                            |                  |
| PEO/HPMA                                              | $1.13 \times 10^{-4}$ S | 5.1  | 0.22  | 80.4 mAh g <sup>-1</sup> at 1 C                    | J. Mater. Chem. A <sup>12</sup>  |                  |
|                                                       | cm <sup>-1</sup>        |      |       | after 1255 cycles                                  |                                  |                  |
|                                                       |                         |      |       |                                                    | 35 °C                            |                  |
| PVDF-HFP/LLATO/Li <sub>3</sub> PO <sub>4</sub>        | $5.1 \times 10^{-4}$ S  | 5    | 0.45  | 76 mAh g <sup>-1</sup> at 2 C                      | J. Mater. Chem. A <sup>13</sup>  |                  |
|                                                       | cm <sup>-1</sup>        |      |       |                                                    |                                  |                  |
|                                                       |                         |      |       |                                                    | 25 °C                            |                  |
| LLZAO/PEO                                             | $2.5 \times 10^{-4}$ S  | 5.58 | 0.53  | 84.1 mAh g <sup>-1</sup> at 1 C                    | Chem. Eng. J. <sup>14</sup>      |                  |
|                                                       | cm <sup>-1</sup>        |      |       |                                                    |                                  |                  |
|                                                       |                         |      |       |                                                    | 25 °C                            |                  |
| PEO/LAGP                                              | $1.67 \times 10^{-4}$ S | NA   | 0.56  | 148.7 mAh g <sup>-1</sup> at 0.2 C                 | Nano Energy <sup>15</sup>        |                  |
|                                                       | cm <sup>-1</sup>        |      |       |                                                    |                                  |                  |
|                                                       |                         |      |       |                                                    | 25 °C                            |                  |
| Cellulose/LAGP                                        | $1.1 \times 10^{-4}$ S  | 4.96 | NA    | 148 mAh g <sup>-1</sup> at 0.1 C                   | Nano Lett. <sup>16</sup>         |                  |
|                                                       | cm <sup>-1</sup>        |      |       |                                                    |                                  |                  |
|                                                       |                         |      |       |                                                    | 60 °C                            |                  |
| PVDF/LLZTO                                            | $8.8 \times 10^{-5}$ S  | 4.25 | NA    | 154.9 mAh g <sup>-1</sup> at 0.1 C                 | Chem. Eng. J. <sup>17</sup>      |                  |
|                                                       | cm <sup>-1</sup>        |      |       |                                                    |                                  |                  |
|                                                       |                         |      |       |                                                    | 55 °C                            |                  |
| PEO/aramid                                            | $8.8 \times 10^{-5}$ S  | 4.2  | NA    | 152 mAh g <sup>-1</sup> at 0.1 C                   | Nano Energy <sup>18</sup>        |                  |
|                                                       | cm <sup>-1</sup>        |      |       |                                                    |                                  |                  |
|                                                       |                         |      |       |                                                    | 50 °C                            |                  |
| PEO/LiZr <sub>2</sub> (PO <sub>4</sub> ) <sub>3</sub> | $1.2 \times 10^{-4}$ S  | 4.8  | 0.36  | 155 mAh g <sup>-1</sup> at 100 uA cm <sup>-2</sup> | J. Am. Chem. Soc. <sup>19</sup>  |                  |
|                                                       | cm <sup>-1</sup>        |      |       |                                                    |                                  |                  |
|                                                       |                         |      |       |                                                    | 30 °C                            |                  |
| PEO/PDA/LLZTO                                         | $1.1 \times 10^{-4}$ S  | 4.8  | NA    | 129.5 mAh g <sup>-1</sup> at 0.2 C                 | J. Mater. Chem. A <sup>20</sup>  |                  |
|                                                       | cm <sup>-1</sup>        |      |       |                                                    |                                  |                  |
|                                                       |                         |      |       |                                                    | 50 °C                            |                  |
| PEO/SiO <sub>2</sub> /Li <sub>2</sub> SO <sub>4</sub> | $1.3 \times 10^{-4}$ S  | 5    | 0.45  | 80 mAh g <sup>-1</sup> at 0.5 C                    | Small <sup>21</sup>              |                  |
|                                                       | cm <sup>-1</sup>        |      |       |                                                    |                                  |                  |
|                                                       |                         |      |       |                                                    | 60 °C                            |                  |
| PEO/vermiculite                                       | $7.9 \times 10^{-7}$ S  | 5.35 | 0.246 | 159.9 mAh g <sup>-1</sup> at 0.1 C                 | Adv. Energy Mater. <sup>22</sup> |                  |
|                                                       | cm <sup>-1</sup>        |      |       |                                                    |                                  |                  |
|                                                       |                         |      |       |                                                    | 60 °C                            |                  |

## Reference

1. H. Chen, D. Adekoya, L. Hencz, J. Ma, S. Chen, C. Yan, H. J. Zhao, G. L. Cui and S. Q. Zhang, *Adv Energy Mater.*, 2020, **10**, 2000049.

2. X. Ao, X. Wang, J. Tan, S. Zhang, C. Su, L. Dong, M. Tang, Z. Wang, B. Tian and H. Wang, *Nano Energy*, 2021, **79**, 105475.
3. P. Lun, P. Liu, H. Lin, Z. Dai, Z. Zhang and D. Chen, *J. Memb. Sci.*, 2019, **580**, 92-100.
4. Z. K. Zhao, Y. M. Zhang, S. J. Li, S. H. Wang, Y. L. Li, H. W. Mi, L. N. Sun, X. Z. Ren and P. X. Zhang, *J. Mater. Chem. A*, 2019, **7**, 25818-25823.
5. H. Li, W. Liu, X. Yang, J. Xiao, Y. Li, L. Sun, X. Ren, P. Zhang and H. Mi, *Chem. Eng. J.*, 2021, **408**, 127254.
6. X. Yang, Q. Sun, C. Zhao, X. Gao, K. Adair, Y. Zhao, J. Luo, X. Lin, J. Liang, H. Huang, L. Zhang, S. Lu, R. Li and X. Sun, *Energy Storage Mater.*, 2019, **22**, 194-199.
7. H. Huo, Y. Chen, J. Luo, X. Yang, X. Guo and X. Sun, *Adv. Energy Mater.*, 2019, **9**, 1804004.
8. D. Lin, P. Y. Yuen, Y. Liu, W. Liu, N. Liu, R. H. Dauskardt and Y. Cui, *Adv. Mater.*, 2018, **30**, 1802661.
9. J. Tan, X. Ao, A. Dai, Y. Yuan, H. Zhuo, H. Lu, L. Zhuang, Y. Ke, C. Su, X. Peng, B. Tian and J. Lu, *Energy Storage Mater.*, 2020, **33**, 173-180.
10. L. Gao, J. Li, J. Ju, L. Wang, J. Yan, B. Cheng, W. Kang, N. Deng and Y. Li, *Chem. Eng. J.*, 2020, **389**, 124478.
11. Y. Li, L. Zhang, Z. Sun, G. Gao, S. Lu, M. Zhu, Y. Zhang, Z. Jia, C. Xiao, H. Bu, K. Xi and S. Ding, *J. Mater. Chem. A*, 2020, **8**, 9579-9589.
12. G. Wang, X. Zhu, A. Rashid, Z. Hu, P. Sun, Q. Zhang and L. Zhang, *J. Mater. Chem. A*, 2020, **8**, 13351-13363.
13. H. Yang, J. Bright, B. Chen, P. Zheng, X. Gao, B. Liu, S. Kasani, X. Zhang and N. Wu, *J. Mater. Chem. A*, 2020, **8**, 7261-7272.
14. D. Cai, D. Wang, Y. Chen, S. Zhang, X. Wang, X. Xia and J. Tu, *Chem. Eng. J.*, 2020, **394**, 124993.
15. X. Wang, H. Zhai, B. Qie, Q. Cheng, A. Li, J. Borovilas, B. Xu, C. Shi, T. Jin, X. Liao, Y. Li, X. He, S. Du, Y. Fu, M. Dontigny, K. Zaghbi and Y. Yang, *Nano Energy*, 2019, **60**, 205-212.
16. C. Wang, D. Huang, S. Li, J. Yu, M. Zhu, N. Liu and Z. Lu, *Nano Lett.*, 2020, **20**, 7397-7404.
17. J. Lu, Y. Liu, P. Yao, Z. Ding, Q. Tang, J. Wu, Z. Ye, K. Huang and X. Liu, *Chem. Eng. J.*, 2019, **367**, 230-238.
18. L. Liu, J. Lyu, J. Mo, H. Yan, L. Xu, P. Peng, J. Li, B. Jiang, L. Chu and M. Li, *Nano Energy*, 2020, **69**, 104398.
19. N. Wu, P.-H. Chien, Y. Li, A. Dolocan, H. Xu, B. Xu, N. S. Grundish, H. Jin, Y.-Y. Hu and J. B. Goodenough, *J. Am. Chem. Soc.*, 2020, **142**, 2497-2505.
20. Z. Huang, W. Pang, P. Liang, Z. Jin, N. Grundish, Y. Li and C.-A. Wang, *J. Mater. Chem. A*, 2019, **7**, 16425-16436.
21. J. Yu, C. Wang, S. Li, N. Liu, J. Zhu and Z. Lu, *Small*, 2019, **15**, 1902729.
22. W. Tang, S. Tang, C. Zhang, Q. Ma, Q. Xiang, Y.-W. Yang and J. Luo, *Adv. Energy Mater.*, 2018, **8**, 1800866.
